# Supplementary material for: Dietary patterns before and during pregnancy and small for gestational age in Japan: a prospective birth cohort study
Source: Nutr J. 2022 Sep 16;21:57. doi: 10.1186/s12937-022-00808-7 (PMC9479276; doi:10.1186/s12937-022-00808-7)
Supplement: Supplementary file 1 — Additional file 1: Supplementary Table 1. Factor loadings and explained variation of dietary patterns identified using RRR, PLS and PCA from early to mid pregnancy. Supplementary Table 2. Associations of dietary patterns with birth weight SD score and SGA from early to mid pregnancy. Supplementary Table 3. Characteristics of participants stratified by the adoption to the RRR patterns. Supplementary Table 4. Characteristics of participants stratified by the adoption to the PLS patterns. Supplementary Table 5. Characteristics of participants stratified by the adoption to the PCA1 patterns. Supplementary Table 6. Characteristics of participants stratified by the adoption to the PCA2 patterns. Supplementary Table 7. Factor loadings and explained variation of dietary patterns identified using RRR, PLS and PCA with the excluded subjects who had available data on dietary intake and incidence of SGA (n = 18,667). Supplementary Table 8. Associations of dietary patterns with birth weight SD score and SGA with the excluded subjects who had available data on dietary intake and incidence of SGA (n = 18,667). Supplementary Table 9. The characteristics of the 17,728 mothers who were analyzed and the 4765 mothers who were excluded from the analysis. Supplementary Table 10. Factor loadings and explained variation of dietary patterns identified using RRR, PLS and PCA in subjects without gestational diabetes mellitus (n = 17,325). Supplementary Table 11. Associations of dietary patterns with birth weight SD score and SGA in subjects without gestational diabetes mellitus (n = 17,325). [file 12937_2022_808_MOESM1_ESM.xlsx]

## Sheet: Table S1
		Supplementary Table 1 Factor loadingsa and explained variation of dietary patterns identified using RRR, PLS and PCA from early to mid pregnancy
				RRR		PLS		PCA
								PCA1		PCA2
		Factor loadings of food groups
		Cereals		0.34		0.31		–0.10		–0.43
		Pulses		0.06		0.1		0.3		0.29
		Nuts and seeds		–0.07		–0.08		0.16		0.009
		Vegetables		0.08		0.17		0.47		0.26
		Fruits		0.47		0.42		0.21		0.13
		Mushroom		0.19		0.2		0.48		0.14
		Fish and shellfish		–0.10		–0.08		0.4		–0.11
		Meat		–0.09		–0.19		0.19		–0.38
		Eggs		–0.08		–0.06		–0.12		0.33
		Milk and dairy products		0.2		0.22		–0.32		0.58
		Confectioneries		–0.15		–0.19		0.05		–0.09
		Alcohol beverage		–0.34		–0.42		–0.21		–0.05
		Non-Alcohol beverage		–0.63		–0.58		0.12		–0.09
		Explained variation (%) in food groups		7.3		8.2		13.5		11.6
		Explained variation (%) in birth weight SD score		0.5		0.46		0.0014		0.014
		RRR, reduced-rank regression; PLS, partial least-squares regression; PCA, principal component analysis; SD, standard deviation.
		a Factor loadings ≧ |0.20| are shown in bold.

## Sheet: Table S2
		Supplementary Table 2 Associations of dietary patterns with birth weight SD score and SGA from early to mid pregnancy
				Quartile 1		Quartile 2						Quartile 3						Quartile 4						P for trend
							β or OR	95% CI					β or OR	95% CI					β or OR	95% CI
		Birth weight SD score, β and 95%CI
		RRR
		Unadjusted model		Reference			0.07	0.03	,	0.11			0.11	0.07	,	0.15			0.17	0.13	,	0.21		< 0.001
		Adjusted model 1a		Reference			0.07	0.03	,	0.11			0.11	0.07	,	0.15			0.16	0.12	,	0.2		< 0.001
		Adjusted model 2b		Reference			0.05	0.01	,	0.09			0.09	0.05	,	0.13			0.12	0.08	,	0.16		< 0.001
		PLS
		Unadjusted model		Reference			0.08	0.04	,	0.12			0.12	0.08	,	0.16			0.17	0.13	,	0.21		< 0.001
		Adjusted model 1		Reference			0.08	0.05	,	0.12			0.11	0.07	,	0.15			0.16	0.12	,	0.2		< 0.001
		Adjusted model 2		Reference			0.07	0.03	,	0.11			0.1	0.06	,	0.14			0.14	0.1	,	0.18		< 0.001
		PCA1
		Unadjusted model		Reference			–0.03	–0.068	,	0.01			–0.002	–0.04	,	0.04			0.005	–0.04	,	0.04		0.54
		Adjusted model 1		Reference			–0.04	–0.08	,	0.003			–0.019	–0.06	,	0.02			–0.02	–0.06	,	0.02		0.51
		Adjusted model 2		Reference			–0.03	–0.07	,	0.01			–0.01	–0.05	,	0.03			–0.01	–0.05	,	0.03		1
		PCA2
		Unadjusted model		Reference			0.01	–0.03	,	0.05			0.02	–0.02	,	0.06			0.03	–0.01	,	0.07		0.06
		Adjusted model 1		Reference			0.01	–0.03	,	0.05			0.02	–0.02	,	0.06			0.03	–0.01	,	0.07		0.13
		Adjusted model 2		Reference			0.01	–0.03	,	0.05			0.04	–0.002	,	0.08			0.05	0.01	,	0.09		0.01
		SGA, OR and 95%CI
		RRR
		Unadjusted model		Reference			0.93	0.79	,	1.1			0.84	0.71	,	0.99			0.78	0.66	,	0.93		0.002
		Adjusted model 1		Reference			0.94	0.8	,	1.11			0.85	0.71	,	1.01			0.8	0.67	,	0.96		0.008
		Adjusted model 2		Reference			0.97	0.82	,	1.15			0.87	0.73	,	1.03			0.85☨	0.71	,	1.02		0.04
		PLS
		Unadjusted model		Reference			0.8	0.68	,	0.95			0.74	0.62	,	0.87			0.73	0.61	,	0.86		< 0.001
		Adjusted model 1		Reference			0.81	0.68	,	0.95			0.74	0.63	,	0.89			0.73	0.61	,	0.87		< 0.001
		Adjusted model 2		Reference			0.83	0.7	,	0.98			0.76	0.64	,	0.9			0.76	0.64	,	0.91		0.001
		PCA1
		Unadjusted model		Reference			1.02	0.86	,	1.21			1.14	0.96	,	1.35			0.98	0.83	,	1.17		0.8
		Adjusted model 1		Reference			1.03	0.87	,	1.23			1.17	0.99	,	1.39			1.02	0.86	,	1.22		0.48
		Adjusted model 2		Reference			1.03	0.86	,	1.22			1.15	0.97	,	1.37			0.99	0.83	,	1.19		0.72
		PCA2
		Unadjusted model		Reference			0.94	0.79	,	1.11			0.95	0.8	,	1.12			0.87	0.73	,	1.03		0.14
		Adjusted model 1		Reference			0.95	0.8	,	1.12			0.97	0.82	,	1.15			0.89	0.75	,	1.06		0.26
		Adjusted model 2		Reference			0.94	0.79	,	1.12			0.95	0.8	,	1.12			0.86	0.72	,	1.03		0.11
		RRR, reduced-rank regression; PLS, partial least-squares regression; PCA, principal component analysis; β, regression coefficients; OR, odds ratio; CI, confidence interval; SGA, small for gestational age. a Model 1 adjusted for maternal age (< 25; 25–29; 30–34; ≧ 35, years), pre-pregnancy body mass index (continuous kg/m2), educational attainment (high school graduate or less; junior college or v…

## Sheet: Table S3
		Supplementary Table 3 Characteristics of participants stratified by the adoption to the RRR patterns
				from pre- to early pregnancy																				from early to mid-pregnancy
				Quartile 1				Quartile 2				Quartile 3				Quartile 4				ANOVA or χ2 test		P for trend		Quartile 1				Quartile 2				Quartile 3				Quartile 4				ANOVA or χ2 test		P for trend
				Mean or n		SD or %		Mean or n		SD or %		Mean or n		SD or %		Mean or n		SD or %						Mean or n		SD or %		Mean or n		SD or %		Mean or n		SD or %		Mean or n		SD or %
		Maternal characteristics
		Maternal age (years), n and %																		< 0.001		―																		0.02		―
		< 25		270		6.1		291		6.6		315		7.1		407		9.2						353		8		308		6.9		324		7.3		298		6.7
		25–29		984		22.2		1127		25.4		1153		26		1229		27.7						1049		23.7		1155		26.1		1172		26.4		1117		25.2
		30–34		1667		37.6		1701		38.4		1666		37.6		1538		34.7						1629		36.8		1635		36.9		1659		37.4		1649		37.2
		≧ 35		1511		34.1		1313		29.6		1298		29.3		1258		28.4						1401		31.6		1334		30.1		1277		28.8		1368		30.9
		Missing		0		0		0		0		0		0		0		0						0		0		0		0		0		0		0		0
		Pre-pregnancy body mass index (kg/m2) , mean and SD		21.5		3.4		21.5		3.4		21.6		3.4		21.7		3.6		0.009		0.001		21.6		3.5		21.5		3.4		21.6		3.4		21.7		3.5		0.11		0.74
		Maternal gestational weight gain (kg), mean and SD		10.1		4.3		10.1		4.1		9.9		4.2		10.3		4.3		0.003		0.19		10		4.4		10.1		4.1		10		4.4		10.3		4.1		0.01		0.04
		Gestational age (week), mean and SD		39		1.2		39		1.2		39		1.2		39		1.1		0.27		0.07		39		1.2		39		1.2		39		1.2		39		1.2		0.04		0.02
		Parity, n and %																		< 0.001		―																		<0.001		―
		One or more		2119		47.8		2263		51.1		2368		53.4		2423		54.7						2518		56.8		2211		49.9		2220		50.1		2224		50.2
		Never		2313		52.2		2169		48.9		2064		46.6		2009		45.3						1914		43.2		2221		50.1		2212		49.9		2208		49.8
		Missing		0		0		0		0		0		0		0		0						0		0		0		0		0		0		0		0
		Educational qualification, n and %																		0.03		―																		<0.001		―
		High school graduate or less		987		22.3		868		19.6		911		20.6		910		20.5						990		22.3		942		21.3		887		20		857		19.3
		College graduate		1083		24.4		1133		25.6		1108		25		1093		24.7						1075		24.3		1059		23.9		1153		26		1130		25.5
		University graduate or above		804		18.1		862		19.4		861		19.4		786		17.7						738		16.7		842		19		848		19.1		885		20
		Missing		1558		35.2		1569		35.4		1552		35		1643		37.1						1629		36.8		1589		35.9		1544		34.8		1560		35.2
		Annual household income (Japanese yen/year), n and %																		< 0.001		―																		<0.001		―
		< 4,000,000		1522		34.3		1473		33.2		1451		32.7		1662		37.5						1659		37.4		1514		34.2		1502		33.9		1433		32.3
		4,000,000–5,999,999		1371		30.9		1357		30.6		1463		33		1334		30.1						1317		29.7		1394		31.5		1435		32.4		1379		31.1
		≧ 6,000,000		1351		30.5		1397		31.5		1325		29.9		1214		27.4						1262		28.5		1339		30.2		1284		29		1402		31.6
		Missing		188		4.2		205		4.6		193		4.4		222		5						194		4.4		185		4.2		211		4.8		218		4.9
		Cigarette smoking, n and %																		< 0.001		―																		<0.001		―
		Never		2141		48.3		2690		60.7		2905		65.5		2962		66.8						2137		48.2		2630		59.3		2878		64.9		3053		68.9
		Quit before pregnancy		1151		26		1029		23.2		973		22		922		20.8						1129		25.5		1099		24.8		949		21.4		898		20.3
		Quit just after noticing pregnancy		932		21		606		13.7		480		10.8		469		10.6						946		21.3		601		13.6		519		11.7		421		9.5
		Current		195		4.4		89		2		59		1.3		67		1.5						204		4.6		88		2		65		1.5		53		1.2
		Missing		13		0.3		18		0.4		15		0.3		12		0.3						16		0.4		14		0.3		21		0.5		7		0.2
		Alcohol consumption, n and %																		< 0.001		―																		<0.001		―
		Never		1351		30.5		1944		43.9		2230		50.3		2491		56.2						1558		35.2		1913		43.2		2196		49.5		2349		53
		Former		1977		44.6		1524		34.4		1400		31.6		1217		27.5						1896		42.8		1613		36.4		1349		30.4		1260		28.4
		Current		1093		24.7		955		21.5		791		17.8		708		16						967		21.8		895		20.2		873		19.7		812		18.3
		Missing		11		0.2		9		0.2		11		0.2		16		0.4						11		0.2		11		0.2		14		0.3		11		0.2
		Folic acid supplement consumption during early pregnancy, n and %																		0.66		―																		<0.001		―
		Yes		2531		57.1		2483		56		2483		56		2493		56.2						2268		51.2		2549		57.5		2556		57.7		2617		59
		No		1897		42.8		1940		43.8		1942		43.8		1929		43.5						2159		48.7		1876		42.3		1870		42.2		1803		40.7
		Missing		4		0.1		9		0.2		7		0.2		10		0.2						5		0.1		7		0.2		6		0.1		12		0.3
		Child characteristics
		Sex, n and %																		0.6		―																		0.17		―
		Boys		2263		51.1		2321		52.4		2301		51.9		2274		51.3						2348		53		2261		51		2297		51.8		2253		50.8
		Girls		2169		48.9		2111		47.6		2131		48.1		2158		48.7						2084		47		2171		49		2135		48.2		2179		49.2
		Missing		0		0		0		0		0		0		0		0						0		0		0		0		0		0		0		0
		Birth weight SD score, mean and SD		0.07		0.95		0.13		0.94		0.17		0.96		0.21		0.96		<0.001		<0.001		0.06		0.93		0.13		0.97		0.17		0.95		0.23		0.96		<0.001		<0.001
		Small for gestational age, n and %																		0.008		―																		0.03		―
		Yes		324		7.3		280		6.3		258		5.8		254		5.7						312		7		292		6.6		264		6		248		5.6
		No		4108		92.7		4152		93.7		4174		94.2		4178		94.3						4120		93		4140		93.4		4168		94		4184		94.4
		Missing		0		0		0		0		0		0		0		0						0		0		0		0		0		0		0		0
		Birth weight (g), mean and SD		3037		369		3068		362		3082		367		3100		371		<0.001		<0.001		3044		359		3066		373		3078		367		3099		371		<0.001		<0.001
		Dietary information
		Energy intake (kcal/day), mean and SD		1806		680		1541		505		1570		480		1828		605		<0.001		0.02		1768		649		1604		554		1606		532		1768		587		<0.001		0.99
		z-score of energy adjusted food intake, mean and SD
		Cereals		-0.56		0.96		-0.12		0.78		0.2		0.76		0.48		1.13		<0.001		<0.001		-0.3		1.09		-0.06		0.9		0.12		0.88		0.24		1.03		<0.001		<0.001
		Pulses		-0.04		1.09		0.01		0.93		0.02		0.88		0.01		1.09		0.02		0.01		-0.09		0.98		-0.02		0.94		0.02		0.98		0.09		1.09		<0.001		<0.001
		Nuts and seeds		-0.09		0.56		-0.02		0.55		0		0.6		0.11		1.73		<0.001		<0.001		0.04		1.6		0.01		0.65		-0.02		0.73		-0.03		0.69		0.002		<0.001
		Vegetables		0.05		1.4		0.02		0.77		-0.01		0.76		-0.05		0.92		<0.001		<0.001		-0.07		1.07		-0.04		0.93		0.01		0.96		0.1		1.03		<0.001		<0.001
		Fruits		-0.47		0.64		-0.23		0.54		-0.04		0.6		0.73		1.46		<0.001		<0.001		-0.24		0.89		-0.14		0.84		-0.01		0.82		0.39		1.26		<0.001		<0.001
		Mushroom		-0.01		1.06		0.01		0.91		0		0.96		0		1.06		0.58		0.76		-0.11		1.04		-0.08		0.86		-0.02		0.84		0.21		1.19		<0.001		<0.001
		Fish and shellfish		-0.05		1.2		0.04		0.88		0.03		0.78		-0.02		1.08		<0.001		0.15		0.01		1		0.01		1		-0.01		0.89		-0.01		1.1		0.81		0.37
		Meat		-0.18		1.01		0.04		0.79		0.07		0.8		0.07		1.29		<0.001		<0.001		0.05		1.16		0.04		1		0.02		0.89		-0.11		0.92		<0.001		<0.001
		Eggs		-0.14		0.8		-0.01		0.73		0.05		0.86		0.1		1.43		<0.001		<0.001		-0.01		1.16		0.04		0.95		0.02		0.94		-0.05		0.93		<0.001		0.02
		Milk and dairy products		0.08		1.42		0.1		0.86		0		0.7		-0.18		0.84		<0.001		<0.001		-0.14		0.93		0.02		0.89		0.04		0.96		0.08		1.17		<0.001		<0.001
		Confectioneries		0.19		1.45		0.06		0.8		-0.06		0.72		-0.19		0.81		<0.001		<0.001		0.08		1.2		0.05		0.97		-0.05		0.83		-0.09		0.95		<0.001		<0.001
		Alcohol beverage		0.62		1.66		-0.05		0.59		-0.2		0.42		-0.37		0.4		<0.001		<0.001		0.36		1.47		0		0.85		-0.13		0.68		-0.23		0.68		<0.001		<0.001
		Non-Alcohol beverage		0.74		1.44		-0.03		0.63		-0.26		0.53		-0.44		0.67		<0.001		<0.001		0.38		1.25		-0.02		0.94		-0.15		0.77		-0.21		0.85		<0.001		<0.001
		z-score of energy adjusted nutrients intake, mean and SD
		Protein		-0.25		1.3		0.11		0.82		0.11		0.73		0.03		1		<0.001		<0.001		-0.16		1.2		0.04		0.97		0.06		0.83		0.06		0.96		<0.001		<0.001
		Fat		-0.05		1.25		0.16		0.83		0.05		0.75		-0.16		1.07		<0.001		<0.001		0.02		1.24		0.08		0.93		0.02		0.88		-0.13		0.89		<0.001		<0.001
		Carbohydrate		-0.41		1.11		-0.15		0.79		0.08		0.72		0.49		1.09		<0.001		<0.001		-0.31		1.16		-0.1		0.9		0.07		0.84		0.34		0.95		<0.001		<0.001
		Sodium		-0.1		1.22		0.04		0.84		0.04		0.86		0.02		1.02		<0.001		<0.001		-0.04		1.11		0		0.93		0		0.93		0.04		1.02		0.001		<0.001
		Potassium		0.02		1.3		0.01		0.84		-0.04		0.77		0.01		1.01		0.009		0.32		-0.17		1.09		-0.06		0.89		0		0.92		0.23		1.05		<0.001		<0.001
		Calcium		0.11		1.4		0.11		0.85		-0.02		0.7		-0.2		0.88		<0.001		<0.001		-0.13		0.99		0.01		0.9		0.03		0.95		0.1		1.13		<0.001		<0.001
		Magnesium		0.06		1.26		0		0.88		-0.04		0.8		-0.02		1		<0.001		<0.001		-0.12		1.12		-0.05		0.89		-0.01		0.91		0.18		1.03		<0.001		<0.001
		Phosphorus		-0.01		1.37		0.11		0.84		0.03		0.72		-0.13		0.94		<0.001		<0.001		-0.15		1.1		0.02		0.92		0.04		0.9		0.09		1.05		<0.001		<0.001
		Iron		-0.19		1.26		-0.04		0.85		0.05		0.79		0.18		0.99		<0.001		<0.001		-0.14		1.18		-0.06		0.88		0.03		0.89		0.16		1		<0.001		<0.001
		Zinc		-0.44		1.31		0.08		0.79		0.19		0.67		0.16		0.98		<0.001		<0.001		-0.29		1.3		0		0.87		0.13		0.8		0.16		0.9		<0.001		<0.001
		Copper		-0.34		1.24		-0.06		0.86		0.1		0.78		0.3		0.94		<0.001		<0.001		-0.27		1.14		-0.07		0.89		0.07		0.87		0.28		1		<0.001		<0.001
		Manganese		0.19		1.55		-0.11		0.75		-0.08		0.64		0.01		0.76		<0.001		<0.001		0.04		1.31		-0.09		0.87		-0.02		0.83		0.08		0.9		<0.001		0.005
		Retinol equivalents		-0.04		0.75		0.01		0.57		0		0.52		0.02		1.69		0.04		0.01		-0.02		1.62		-0.03		0.58		0.01		0.65		0.03		0.78		0.02		0.005
		Vitamin D		-0.06		1.18		0.04		1.03		0.03		0.71		-0.02		1.02		<0.001		0.048		-0.03		0.9		0.02		1.18		0		0.77		0.01		1.11		0.16		0.21
		Vitamin K		-0.03		1.21		0.03		0.97		0.03		0.85		-0.03		0.93		0.001		0.83		-0.09		1.07		-0.02		0.91		0.01		0.89		0.1		1.1		<0.001		<0.001
		Vitamin B1		-0.39		1.14		-0.01		0.73		0.09		0.73		0.31		1.18		<0.001		<0.001		-0.23		1.2		-0.04		0.97		0.06		0.82		0.21		0.92		<0.001		<0.001
		Vitamin B2		0.2		1.28		0.09		0.84		-0.05		0.7		-0.24		1.04		<0.001		<0.001		-0.04		1.14		0.01		0.89		0		0.9		0.03		1.05		0.021		0.008
		Niacin		0.17		1.27		0		0.78		-0.05		0.76		-0.12		1.07		<0.001		<0.001		0.17		1.15		0		0.94		-0.07		0.85		-0.1		1.01		<0.001		<0.001
		Vitamin B6		-0.05		1.29		-0.04		0.82		0		0.76		0.09		1.03		<0.001		<0.001		-0.08		1.12		-0.06		0.95		-0.01		0.86		0.15		1.03		<0.001		<0.001
		Vitamin B12		-0.02		1.09		0.05		0.75		0.02		0.7		-0.05		1.32		<0.001		0.14		0.03		1.15		0		0.8		0		1.04		-0.03		0.98		0.07		0.02
		Folate		0.07		1.28		-0.04		0.78		-0.06		0.74		0.02		1.09		<0.001		0.01		-0.05		1.18		-0.08		0.85		-0.02		0.9		0.15		1.03		<0.001		<0.001
		Pantothenic acid		-0.16		1.3		0.05		0.86		0.06		0.74		0.05		0.99		<0.001		<0.001		-0.23		1.15		-0.02		0.89		0.05		0.88		0.19		1.01		<0.001		<0.001
		Vitamin C		-0.2		1.11		-0.15		0.71		-0.06		0.73		0.41		1.23		<0.001		<0.001		-0.17		0.99		-0.13		0.87		-0.02		0.89		0.31		1.16		<0.001		<0.001
		Cholesterol		-0.15		0.9		0.04		0.75		0.06		0.84		0.05		1.38		<0.001		<0.001		0		1.19		0.05		0.94		0.02		0.91		-0.08		0.93		<0.001		<0.001
		Dietary fibre		-0.15		1.24		-0.02		0.81		0.02		0.81		0.15		1.05		<0.001		<0.001		-0.18		1.04		-0.06		0.88		0.01		0.91		0.24		1.11		<0.001		<0.001
		Lycopene		-0.01		1.14		-0.01		0.83		-0.02		0.73		0.05		1.21		0.005		0.02		-0.05		1.23		-0.04		0.84		0		0.85		0.09		1.01		<0.001		<0.001
		α-carotene		0.04		1.29		0.02		0.83		0		0.83		-0.06		0.97		<0.001		<0.001		-0.06		0.94		0		1.04		0.01		0.94		0.05		1.07		<0.001		<0.001
		β-carotene		0.01		1.34		0.01		0.83		0		0.81		-0.01		0.92		0.65		0.29		-0.09		0.97		-0.03		0.99		0.01		0.95		0.11		1.08		<0.001		<0.001
		β-Cryptoxanthin		-0.36		0.64		-0.19		0.55		-0.04		0.63		0.59		1.54		<0.001		<0.001		-0.18		0.88		-0.11		0.83		-0.01		0.87		0.31		1.28		<0.001		<0.001
		RRR, reduced-rank regression.

## Sheet: Table S4
		Supplementary Table 4 Characteristics of participants stratified by the adoption to the PLS patterns
				from pre- to early pregnancy																				from early to mid-pregnancy
				Quartile 1				Quartile 2				Quartile 3				Quartile 4				ANOVA or χ2 test		P for trend		Quartile 1				Quartile 2				Quartile 3				Quartile 4				ANOVA or χ2 test		P for trend
				Mean or n		SD or %		Mean or n		SD or %		Mean or n		SD or %		Mean or n		SD or %						Mean or n		SD or %		Mean or n		SD or %		Mean or n		SD or %		Mean or n		SD or %
		Maternal characteristics
		Maternal age (years), n and %																		<0.001		―																		0.001		―
		< 25		287		6.5		306		6.9		309		7		381		8.6						364		8.2		335		7.6		310		7		274		6.2
		25–29		1005		22.7		1092		24.6		1185		26.7		1211		27.3						1061		23.9		1185		26.7		1155		26.1		1092		24.6
		30–34		1660		37.5		1707		38.5		1640		37		1565		35.3						1623		36.6		1622		36.6		1654		37.3		1673		37.7
		≧ 35		1480		33.4		1327		29.9		1298		29.3		1275		28.8						1384		31.2		1290		29.1		1313		29.6		1393		31.4
		Missing		0		0		0		0		0		0		0		0						0		0		0		0		0		0		0		0
		Pre-pregnancy body mass index (kg/m2) , mean and SD		21.5		3.4		21.6		3.4		21.6		3.5		21.7		3.5		0.049		0.005		21.7		3.5		21.5		3.4		21.6		3.4		21.6		3.5		0.14		0.25
		Maternal gestational weight gain (kg), mean and SD		10.1		4.2		10		4.1		10		4.2		10.2		4.3		0.08		0.19		10		4.4		10.1		4.1		10		4.4		10.2		4.1		0.46		0.41
		Gestational age (week), mean and SD		39		1.2		39		1.2		39		1.2		39		1.1		0.55		0.56		39		1.2		39		1.2		39		1.2		39		1.2		0.17		0.04
		Parity, n and %																		<0.001		―																		<0.001		―
		One or more		2041		46.1		2219		50.1		2369		53.5		2544		57.4						2429		54.8		2230		50.3		2248		50.7		2266		51.1
		Never		2281		53.9		2103		49.9		1953		46.5		1778		42.6						2003		45.2		2202		49.7		2184		49.3		2166		48.9
		Missing		0		0		0		0		0		0		0		0						0		0		0		0		0		0		0		0
		Educational qualification, n and %																		0.01		―																		<0.001		―
		High school graduate or less		983		22.2		862		19.4		933		21.1		898		20.3						1013		22.9		937		21.1		866		19.5		860		19.4
		College graduate		1068		24.1		1144		25.8		1097		24.8		1108		25						1039		23.4		1077		24.3		1147		25.9		1154		26
		University graduate or above		810		18.3		857		19.3		864		19.5		782		17.6						731		16.5		825		18.6		843		19		914		20.6
		Missing		1571		35.4		1569		35.4		1538		34.7		1644		37.1						1649		37.2		1593		35.9		1576		35.6		1504		33.9
		Annual household income (Japanese yen/year), n and %																		<0.001		―																		<0.001		―
		< 4,000,000		1516		34.2		1485		33.5		1469		33.1		1638		37						1680		37.9		1535		34.6		1461		33		1432		32.3
		4,000,000–5,999,999		1352		30.5		1370		30.9		1445		32.6		1358		30.6						1313		29.6		1402		31.6		1433		32.3		1377		31.1
		≧ 6,000,000		1383		31.2		1371		30.9		1318		29.7		1215		27.4						1262		28.5		1303		29.4		1317		29.7		1405		31.7
		Missing		181		4.1		206		4.6		200		4.5		221		5						177		4		192		4.3		221		5		218		4.9
		Cigarette smoking, n and %																		<0.001		―																		<0.001		―
		Never		2079		46.9		2701		60.9		2920		65.9		2998		67.6						2096		47.3		2628		59.3		2879		65		3095		69.8
		Quit before pregnancy		1174		26.5		1031		23.3		955		21.5		915		20.6						1139		25.7		1115		25.2		932		21		889		20.1
		Quit just after noticing pregnancy		968		21.8		602		13.6		478		10.8		439		9.9						975		22		583		13.2		541		12.2		388		8.8
		Current		199		4.5		82		1.9		61		1.4		68		1.5						205		4.6		89		2		62		1.4		54		1.2
		Missing		12		0.3		16		0.4		18		0.4		12		0.3						17		0.4		17		0.4		18		0.4		6		0.1
		Alcohol consumption, n and %																		<0.001		―																		<0.001		―
		Never		1196		27		1962		44.3		2280		51.4		2578		58.2						1478		33.3		1965		44.3		2215		50		2358		53.2
		Former		2115		47.7		1490		33.6		1359		30.7		1154		26						1940		43.8		1561		35.2		1363		30.8		1254		28.3
		Current		1111		25.1		968		21.8		783		17.7		685		15.5						1001		22.6		897		20.2		841		19		808		18.2
		Missing		10		0.2		12		0.3		10		0.2		15		0.3						13		0.3		9		0.2		13		0.3		12		0.3
		Folic acid supplement consumption during early pregnancy, n and %																		0.48		―																		<0.001		―
		Yes		2545		57.4		2483		56		2492		56.2		2470		55.7						2261		51		2535		57.2		2577		58.1		2617		59
		No		1883		42.5		1939		43.8		1933		43.6		1953		44.1						2165		48.8		1891		42.7		1849		41.7		1803		40.7
		Missing		4		0.1		10		0.2		7		0.2		9		0.2						6		0.1		6		0.1		6		0.1		12		0.3
		Child characteristics
		Sex, n and %																		0.26		―																		0.19		―
		Boys		2258		50.9		2345		52.9		2284		51.5		2272		51.3						2348		53		2254		50.9		2293		51.7		2264		51.1
		Girls		2174		49.1		2087		47.1		2148		48.5		2160		48.7						2084		47		2178		49.1		2139		48.3		2168		48.9
		Missing		0		0		0		0		0		0		0		0						0		0		0		0		0		0		0		0
		Birth weight SD score, mean and SD		0.07		0.96		0.13		0.93		0.19		0.96		0.2		0.96		<0.001		<0.001		0.05		0.94		0.14		0.96		0.17		0.94		0.22		0.96		<0.001		<0.001
		Small for gestational age, n and %																		0.001		―																		<0.001		―
		Yes		334		7.5		273		6.2		259		5.8		250		5.6						337		7.6		275		6.2		254		5.7		250		5.6
		No		4098		92.5		4159		93.8		4173		94.2		4182		94.4						4095		92.4		4157		93.8		4178		94.3		4182		94.4
		Missing		0		0		0		0		0		0		0		0						0		0		0		0		0		0		0		0
		Birth weight (g), mean and SD		3035		371		3068		360		3088		370		3096		368		<0.001		<0.001		3042		364		3067		372		3078		366		3100		368		<0.001		<0.001
		Dietary information
		Energy intake (kcal/day), mean and SD		1788.6		682.87		1519		501		1591		496		1847		588		<0.001		<0.001		1773		660		1578		538		1616		535		1779		582		<0.001		0.15
		z-score of energy adjusted food intake, mean and SD
		Cereals		-0.6		0.97		-0.17		0.74		0.2		0.76		0.56		1.1		<0.001		<0.001		-0.3		1.1		-0.05		0.89		0.12		0.89		0.23		1.02		<0.001		<0.001
		Pulses		-0.03		1.07		0.02		0.96		0.01		0.94		0		1.03		0.08		0.23		-0.11		0.9		-0.04		0.95		0.02		0.96		0.13		1.16		<0.001		<0.001
		Nuts and seeds		-0.08		0.59		-0.03		0.53		-0.01		0.59		0.11		1.73		<0.001		<0.001		0.05		1.61		0.01		0.64		-0.01		0.74		-0.05		0.66		<0.001		<0.001
		Vegetables		-0.06		1.2		0.02		0.79		0.01		0.92		0.03		1.04		<0.001		<0.001		-0.13		0.96		-0.06		0.97		0.01		0.91		0.18		1.12		<0.001		<0.001
		Fruits		-0.45		0.65		-0.21		0.55		-0.05		0.63		0.7		1.46		<0.001		<0.001		-0.25		0.88		-0.11		0.86		-0.02		0.82		0.38		1.26		<0.001		<0.001
		Mushroom		-0.08		1		0		0.86		0		0.89		0.08		1.2		<0.001		<0.001		-0.12		0.98		-0.08		0.89		-0.01		0.87		0.22		1.19		<0.001		<0.001
		Fish and shellfish		-0.09		0.98		0.04		0.98		0.03		0.76		0.02		1.22		<0.001		<0.001		0.01		1.01		0.02		1.01		0		1.05		-0.03		0.93		0.19		0.09
		Meat		-0.11		1.1		0.07		0.79		0.07		0.94		-0.04		1.12		<0.001		0.002		0.12		1.23		0.07		0.86		0.01		0.94		-0.19		0.9		<0.001		<0.001
		Eggs		-0.1		0.93		0.02		0.79		0.04		0.84		0.05		1.33		<0.001		<0.001		-0.02		1.15		0.05		0.95		0.03		0.95		-0.05		0.93		<0.001		0.12
		Milk and dairy products		0.1		1.45		0.11		0.85		0		0.71		-0.21		0.79		<0.001		<0.001		-0.15		0.97		0		0.83		0.04		0.92		0.11		1.22		<0.001		<0.001
		Confectioneries		0.16		1.44		0.09		0.78		-0.07		0.72		-0.18		0.84		<0.001		<0.001		0.12		1.27		0.05		0.9		-0.06		0.81		-0.12		0.95		<0.001		<0.001
		Alcohol beverage		0.75		1.66		-0.1		0.45		-0.24		0.34		-0.41		0.34		<0.001		<0.001		0.44		1.53		-0.03		0.75		-0.15		0.65		-0.26		0.62		<0.001		<0.001
		Non-Alcohol beverage		0.69		1.45		0.01		0.64		-0.25		0.54		-0.45		0.66		<0.001		<0.001		0.37		1.29		-0.01		0.88		-0.13		0.8		-0.22		0.85		<0.001		<0.001
		z-score of energy adjusted nutrients intake, mean and SD
		Protein		-0.25		1.31		0.14		0.84		0.11		0.75		0		0.97		<0.001		<0.001		-0.16		1.22		0.03		0.88		0.07		0.93		0.06		0.91		<0.001		<0.001
		Fat		-0.07		1.28		0.22		0.8		0.07		0.8		-0.21		0.99		<0.001		<0.001		0.01		1.25		0.09		0.89		0.03		0.91		-0.13		0.88		<0.001		<0.001
		Carbohydrate		-0.49		1.1		-0.19		0.76		0.09		0.75		0.58		1.01		<0.001		<0.001		-0.33		1.15		-0.1		0.88		0.07		0.88		0.36		0.93		<0.001		<0.001
		Sodium		-0.18		1.14		0.05		0.83		0.06		0.9		0.08		1.07		<0.001		<0.001		-0.09		1.07		0		0.96		0		0.91		0.08		1.04		<0.001		<0.001
		Potassium		-0.03		1.26		0.04		0.82		-0.05		0.79		0.04		1.05		<0.001		0.1		-0.2		1.06		-0.09		0.89		0		0.89		0.29		1.08		<0.001		<0.001
		Calcium		0.11		1.43		0.12		0.84		-0.02		0.71		-0.21		0.83		<0.001		<0.001		-0.16		1.01		-0.01		0.85		0.03		0.92		0.14		1.17		<0.001		<0.001
		Magnesium		0.03		1.21		0		0.89		-0.05		0.82		0.02		1.04		0.001		0.33		-0.14		1.08		-0.1		0.87		-0.01		0.92		0.25		1.07		<0.001		<0.001
		Phosphorus		-0.01		1.39		0.13		0.83		0.03		0.75		-0.15		0.88		<0.001		<0.001		-0.16		1.1		-0.01		0.87		0.05		0.92		0.12		1.07		<0.001		<0.001
		Iron		-0.24		1.2		-0.02		0.88		0.05		0.85		0.21		0.98		<0.001		<0.001		-0.17		1.13		-0.06		0.87		0.03		0.89		0.21		1.05		<0.001		<0.001
		Zinc		-0.44		1.34		0.11		0.76		0.2		0.76		0.13		0.89		<0.001		<0.001		-0.3		1.28		0		0.85		0.12		0.84		0.17		0.89		<0.001		<0.001
		Copper		-0.42		1.16		-0.06		0.9		0.1		0.78		0.37		0.96		<0.001		<0.001		-0.31		1.1		-0.1		0.82		0.07		0.89		0.34		1.06		<0.001		<0.001
		Manganese		0.13		1.53		-0.11		0.77		-0.07		0.67		0.06		0.75		<0.001		0.01		0.02		1.3		-0.08		0.87		-0.03		0.84		0.09		0.91		<0.001		<0.001
		Retinol equivalents		-0.05		0.74		0.03		0.7		0.02		1.27		0		1.17		<0.001		0.03		-0.05		1.37		0		1.1		0		0.59		0.05		0.75		<0.001		<0.001
		Vitamin D		-0.1		0.9		0.05		1		0.03		0.7		0.02		1.3		<0.001		<0.001		-0.04		0.91		0.02		1.09		0.02		1.1		0		0.89		0.02		0.12
		Vitamin K		-0.1		1.08		0.04		1.05		0.02		0.81		0.03		1.04		<0.001		<0.001		-0.13		0.97		-0.06		0.82		0.03		0.97		0.17		1.18		<0.001		<0.001
		Vitamin B1		-0.4		1.2		0.03		0.71		0.09		0.76		0.27		1.11		<0.001		<0.001		-0.23		1.27		-0.02		0.81		0.05		0.89		0.2		0.91		<0.001		<0.001
		Vitamin B2		0.21		1.32		0.12		0.81		-0.05		0.83		-0.28		0.88		<0.001		<0.001		-0.05		1.14		-0.01		0.86		0.01		0.89		0.06		1.08		<0.001		<0.001
		Niacin		0.21		1.25		0.01		0.83		-0.07		0.79		-0.14		1.03		<0.001		<0.001		0.24		1.21		0		0.87		-0.08		0.92		-0.16		0.92		<0.001		<0.001
		Vitamin B6		-0.04		1.21		-0.04		0.85		-0.02		0.79		0.1		1.09		<0.001		<0.001		-0.05		1.13		-0.08		0.9		-0.02		0.94		0.15		1		<0.001		<0.001
		Vitamin B12		-0.02		0.98		0.06		0.85		0.02		0.79		-0.05		1.3		<0.001		0.04		0.03		1.07		0.03		1.15		-0.01		0.87		-0.05		0.88		<0.001		<0.001
		Folate		0.01		1.17		-0.02		0.82		-0.05		0.88		0.06		1.09		<0.001		0.052		-0.1		1.03		-0.09		0.99		-0.02		0.87		0.21		1.08		<0.001		<0.001
		Pantothenic acid		-0.16		1.31		0.08		0.87		0.05		0.8		0.03		0.92		<0.001		<0.001		-0.24		1.11		-0.05		0.86		0.06		0.9		0.22		1.05		<0.001		<0.001
		Vitamin C		-0.26		0.98		-0.12		0.71		-0.05		0.81		0.43		1.26		<0.001		<0.001		-0.21		0.94		-0.11		0.89		-0.03		0.85		0.35		1.19		<0.001		<0.001
		Cholesterol		-0.1		1		0.08		0.79		0.05		0.84		-0.03		1.28		<0.001		0.002		0		1.17		0.07		0.94		0.03		0.94		-0.1		0.92		<0.001		<0.001
		Dietary fibre		-0.27		1.1		-0.02		0.83		0.03		0.86		0.26		1.11		<0.001		<0.001		-0.24		0.98		-0.09		0.86		0.01		0.9		0.32		1.15		<0.001		<0.001
		Lycopene		-0.02		1.13		-0.01		0.8		-0.02		0.75		0.06		1.23		<0.001		<0.001		-0.05		1.25		-0.05		0.78		0		0.84		0.1		1.05		<0.001		<0.001
		α-carotene		-0.05		1.17		0.03		0.88		0.01		0.86		0		1.05		0.001		0.03		-0.11		0.84		-0.02		0.99		0.02		0.99		0.11		1.14		<0.001		<0.001
		β-carotene		-0.1		1.19		0.02		0.89		0.01		0.85		0.06		1.03		<0.001		<0.001		-0.15		0.84		-0.04		0.98		0.01		0.97		0.18		1.16		<0.001		<0.001
		β-Cryptoxanthin		-0.35		0.6		-0.17		0.55		-0.05		0.69		0.57		1.54		<0.001		<0.001		-0.19		0.89		-0.09		0.85		-0.02		0.83		0.31		1.29		<0.001		<0.001
		PSL, partial least-squares regression.

## Sheet: Table S5
		Supplementary Table 5 Characteristics of participants stratified by the adoption to the PCA1 patterns
				from pre- to early pregnancy																				from early to mid-pregnancy
				Quartile 1				Quartile 2				Quartile 3				Quartile 4				ANOVA or χ2 test		P for trend		Quartile 1				Quartile 2				Quartile 3				Quartile 4				ANOVA or χ2 test		P for trend
				Mean or n		SD or %		Mean or n		SD or %		Mean or n		SD or %		Mean or n		SD or %						Mean or n		SD or %		Mean or n		SD or %		Mean or n		SD or %		Mean or n		SD or %
		Maternal characteristics
		Maternal age (years), n and %																		<0.001		―																		<0.001		―
		< 25		449		10.1		332		7.5		304		6.9		198		4.5						388		8.8		369		8.3		317		7.2		209		4.7
		25–29		1253		28.3		1177		26.6		1138		25.7		925		20.9						1205		27.2		1216		27.4		1099		24.8		973		22
		30–34		1592		35.9		1636		36.9		1630		36.8		1714		38.7						1613		36.4		1640		37		1649		37.2		1670		37.7
		≧ 35		1138		25.7		1287		29		1360		30.7		1595		36						1226		27.7		1207		27.2		1367		30.8		1580		35.6
		Missing		0		0		0		0		0		0		0		0						0		0		0		0		0		0		0		0
		Pre-pregnancy body mass index (kg/m2) , mean and SD		21.6		3.5		21.5		3.3		21.6		3.5		21.7		3.5		0.35		0.26		21.5		3.3		21.5		3.4		21.6		3.5		21.7		3.6		0.009		<0.001
		Maternal gestational weight gain (kg), mean and SD		10.4		4.3		10.1		4.1		10		4.3		9.9		4.3		<0.001		<0.001		10.4		4.3		10.1		4		10		4.3		9.9		4.3		<0.001		<0.001
		Gestational age (week), mean and SD		39		1.2		39		1.2		39		1.2		39		1.2		0.03		0.003		39		1.2		39		1.2		39		1.2		38.9		1.2		0.009		0.005
		Parity, n and %																		<0.001		―																		<0.001		―
		One or more		2171		49		2245		50.7		2336		52.7		2421		54.6						2093		47.2		2221		50.1		2280		51.4		2579		58.2
		Never		2261		51		2187		49.3		2096		47.3		2011		45.4						2339		52.8		2211		49.9		2152		48.6		1853		41.8
		Missing		0		0		0		0		0		0		0		0						0		0		0		0		0		0		0		0
		Educational qualification, n and %																		<0.001		―																		<0.001		―
		High school graduate or less		1075		24.3		912		20.6		876		19.8		813		18.3						1021		23		952		21.5		883		19.9		820		18.5
		College graduate		1013		22.9		1130		25.5		1104		24.9		1170		26.4						1097		24.8		1120		25.3		1119		25.2		1081		24.4
		University graduate or above		712		16.1		791		17.8		894		20.2		916		20.7						738		16.7		817		18.4		866		19.5		892		20.1
		Missing		1632		36.8		1599		36.1		1558		35.2		1533		34.6						1576		35.6		1543		34.8		1564		35.3		1639		37
		Annual household income (Japanese yen/year), n and %																		<0.001		―																		<0.001		―
		< 4,000,000		1754		39.6		1534		34.6		1473		33.2		1347		30.4						1689		38.1		1548		34.9		1483		33.5		1388		31.3
		4,000,000–5,999,999		1295		29.2		1406		31.7		1377		31.1		1447		32.6						1358		30.6		1384		31.2		1391		31.4		1392		31.4
		≧ 6,000,000		1166		26.3		1309		29.5		1374		31		1438		32.4						1172		26.4		1309		29.5		1357		30.6		1449		32.7
		Missing		217		4.9		183		4.1		208		4.7		200		4.5						213		4.8		191		4.3		201		4.5		203		4.6
		Cigarette smoking, n and %																		<0.001		―																		<0.001		―
		Never		2401		54.2		2733		61.7		2777		62.7		2787		62.9						2498		56.4		2708		61.1		2765		62.4		2727		61.5
		Quit before pregnancy		1029		23.2		1008		22.7		987		22.3		1051		23.7						1025		23.1		1004		22.7		993		22.4		1053		23.8
		Quit just after noticing pregnancy		834		18.8		580		13.1		569		12.8		504		11.4						758		17.1		599		13.5		567		12.8		563		12.7
		Current		152		3.4		96		2.2		81		1.8		81		1.8						130		2.9		105		2.4		97		2.2		78		1.8
		Missing		16		0.4		15		0.3		18		0.4		9		0.2						21		0.5		16		0.4		10		0.2		11		0.2
		Alcohol consumption, n and %																		<0.001		―																		<0.001		―
		Never		1661		37.5		2027		45.7		2172		49		2156		48.6						1675		37.8		2092		47.2		2092		47.2		2157		48.7
		Former		1833		41.4		1523		34.4		1397		31.5		1365		30.8						1811		40.9		1489		33.6		1454		32.8		1364		30.8
		Current		923		20.8		874		19.7		848		19.1		902		20.4						933		21.1		833		18.8		879		19.8		902		20.4
		Missing		15		0.3		8		0.2		15		0.3		9		0.2						13		0.3		18		0.4		7		0.2		9		0.2
		Folic acid supplement consumption during early pregnancy, n and %																		0.002		―																		0.051		―
		Yes		2391		53.9		2469		55.7		2553		57.6		2577		58.1						2442		55.1		2440		55.1		2566		57.9		2542		57.4
		No		2033		45.9		1957		44.2		1870		42.2		1848		41.7						1983		44.7		1983		44.7		1860		42		1882		42.5
		Missing		8		0.2		6		0.1		9		0.2		7		0.2						7		0.2		9		0.2		6		0.1		8		0.2
		Child characteristics
		Sex, n and %																		0.32		―																		0.82		―
		Boys		2289		51.6		2251		50.8		2281		51.5		2338		52.8						2308		52.1		2267		51.2		2301		51.9		2283		51.5
		Girls		2143		48.4		2181		49.2		2151		48.5		2094		47.2						2124		47.9		2165		48.8		2131		48.1		2149		48.5
		Missing		0		0		0		0		0		0		0		0						0		0		0		0		0		0		0		0
		Birth weight SD score, mean and SD		0.13		0.97		0.16		0.94		0.14		0.95		0.15		0.97		0.32		0.33		0.15		0.96		0.12		0.95		0.15		0.97		0.16		0.94		0.36		0.54
		Small for gestational age, n and %																		0.36		―																		0.31		―
		Yes		290		6.5		257		5.8		275		6.2		294		6.6						270		6.1		275		6.2		305		6.9		266		6
		No		4142		93.5		4175		94.2		4157		93.8		4138		93.4						4162		93.9		4157		93.8		4127		93.1		4166		94
		Missing		0		0		0		0		0		0		0		0						0		0		0		0		0		0		0		0
		Birth weight (g), mean and SD		3066		369		3077		364		3071		368		3073		372		0.62		0.58		3072		370		3065		365		3074		375		3076		363		0.51		0.4
		Dietary information
		Energy intake (kcal/day), mean and SD		1843		684		1509		472		1555		472		1838		611		<0.001		0.43		1716		625		1563		528		1614		504		1853		641		<0.001		<0.001
		z-score of energy adjusted food intake, mean and SD
		Cereals		0.22		1.22		0.15		0.82		-0.06		0.84		-0.31		0.98		<0.001		<0.001		0.09		1.06		0.08		0.98		0		0.91		-0.17		1.03		<0.001		<0.001
		Pulses		-0.43		0.61		-0.18		0.54		0.03		0.71		0.58		1.51		<0.001		<0.001		-0.24		0.75		-0.14		0.72		-0.02		0.81		0.4		1.42		<0.001		<0.001
		Nuts and seeds		-0.17		0.45		-0.05		0.46		0.02		0.58		0.2		1.78		<0.001		<0.001		-0.1		0.56		-0.05		0.52		0.01		0.67		0.14		1.71		<0.001		<0.001
		Vegetables		-0.6		0.55		-0.2		0.45		0.07		0.56		0.72		1.51		<0.001		<0.001		-0.37		0.73		-0.13		0.78		0.03		0.85		0.47		1.32		<0.001		<0.001
		Fruits		-0.48		0.67		-0.12		0.63		0.08		0.75		0.51		1.44		<0.001		<0.001		-0.22		0.91		-0.04		0.96		0.05		0.89		0.22		1.17		<0.001		<0.001
		Mushroom		-0.64		0.51		-0.26		0.47		0.05		0.62		0.86		1.38		<0.001		<0.001		-0.42		0.7		-0.18		0.7		0.03		0.83		0.57		1.34		<0.001		<0.001
		Fish and shellfish		-0.49		0.65		-0.09		0.57		0.11		0.68		0.48		1.52		<0.001		<0.001		-0.33		0.91		-0.1		0.68		0.07		0.96		0.36		1.24		<0.001		<0.001
		Meat		-0.06		1.33		0.05		0.78		0.07		0.76		-0.05		1.02		<0.001		0.53		-0.17		1.01		0		0.9		0.08		0.87		0.09		1.17		<0.001		<0.001
		Eggs		0.14		1.61		-0.01		0.64		-0.01		0.69		-0.12		0.7		<0.001		<0.001		0.05		1.15		0.03		0.95		-0.03		0.82		-0.05		1.05		<0.001		<0.001
		Milk and dairy products		0.33		1.66		-0.01		0.61		-0.07		0.53		-0.25		0.66		<0.001		<0.001		0.2		1.36		0.03		0.84		-0.06		0.79		-0.16		0.87		<0.001		<0.001
		Confectioneries		-0.23		0.99		0		0.82		0.07		0.85		0.16		1.24		<0.001		<0.001		-0.07		1.11		0		0.84		0.05		0.92		0.01		1.1		<0.001		<0.001
		Alcohol beverage		0.36		1.59		-0.02		0.69		-0.1		0.61		-0.24		0.64		<0.001		<0.001		0.31		1.42		-0.03		0.79		-0.08		0.75		-0.2		0.81		<0.001		<0.001
		Non-Alcohol beverage		-0.22		0.85		-0.09		0.74		0.07		0.92		0.24		1.33		<0.001		<0.001		-0.08		0.96		-0.01		0.97		0.01		0.98		0.08		1.09		<0.001		<0.001
		z-score of energy adjusted nutrients intake, mean and SD
		Protein		-0.33		1.24		-0.1		0.7		0.08		0.68		0.34		1.12		<0.001		<0.001		-0.3		1.14		-0.09		0.81		0.05		0.84		0.34		1.06		<0.001		<0.001
		Fat		-0.24		1.34		-0.04		0.79		0.09		0.78		0.19		0.93		<0.001		<0.001		-0.24		1.13		-0.03		0.92		0.06		0.86		0.22		1.01		<0.001		<0.001
		Carbohydrate		-0.07		1.22		0.04		0.82		-0.02		0.84		0.04		1.06		<0.001		<0.001		0.01		1.08		0.05		0.97		0		0.88		-0.06		1.06		<0.001		<0.001
		Sodium		-0.58		0.92		-0.14		0.71		0.14		0.76		0.58		1.17		<0.001		<0.001		-0.4		0.94		-0.1		0.89		0.07		0.87		0.43		1.09		<0.001		<0.001
		Potassium		-0.61		1.11		-0.26		0.59		0.08		0.56		0.79		1.02		<0.001		<0.001		-0.37		1.03		-0.16		0.8		0.02		0.81		0.51		1.1		<0.001		<0.001
		Calcium		0.1		1.64		-0.08		0.65		-0.03		0.58		0.01		0.73		<0.001		0.003		0.06		1.34		-0.02		0.85		-0.05		0.8		0.01		0.92		<0.001		0.003
		Magnesium		-0.59		1.04		-0.25		0.63		0.07		0.62		0.77		1.07		<0.001		<0.001		-0.33		1		-0.18		0.79		0.01		0.81		0.5		1.15		<0.001		<0.001
		Phosphorus		-0.09		1.55		-0.11		0.69		0.02		0.63		0.18		0.82		<0.001		<0.001		-0.09		1.28		-0.06		0.87		-0.01		0.82		0.16		0.95		<0.001		<0.001
		Iron		-0.73		0.98		-0.22		0.56		0.12		0.6		0.83		1.04		<0.001		<0.001		-0.46		0.93		-0.15		0.83		0.05		0.81		0.57		1.11		<0.001		<0.001
		Zinc		-0.12		1.46		-0.04		0.73		0.03		0.69		0.13		0.9		<0.001		<0.001		-0.21		1.22		-0.03		0.93		0.03		0.83		0.2		0.94		<0.001		<0.001
		Copper		-0.67		1.01		-0.17		0.62		0.09		0.63		0.75		1.07		<0.001		<0.001		-0.4		1		-0.12		0.81		0.04		0.83		0.48		1.12		<0.001		<0.001
		Manganese		-0.34		0.88		-0.11		0.7		0.05		0.88		0.4		1.29		<0.001		<0.001		-0.2		0.9		-0.05		0.93		0.02		0.95		0.22		1.16		<0.001		<0.001
		Retinol equivalents		-0.18		1.64		-0.07		0.47		0.04		0.56		0.21		0.84		<0.001		<0.001		-0.14		0.71		-0.03		1.27		0.03		1.12		0.14		0.76		<0.001		<0.001
		Vitamin D		-0.38		0.66		-0.08		0.56		0.08		0.66		0.38		1.58		<0.001		<0.001		-0.25		0.95		-0.09		0.63		0.05		0.96		0.29		1.28		<0.001		<0.001
		Vitamin K		-0.46		0.94		-0.13		0.74		0.07		0.68		0.52		1.28		<0.001		<0.001		-0.26		1		-0.11		0.79		0.01		0.88		0.35		1.18		<0.001		<0.001
		Vitamin B1		-0.5		1.24		-0.12		0.72		0.1		0.68		0.52		0.98		<0.001		<0.001		-0.39		1.02		-0.09		0.84		0.07		0.8		0.41		1.13		<0.001		<0.001
		Vitamin B2		-0.01		1.58		-0.12		0.66		0		0.63		0.13		0.8		<0.001		<0.001		-0.02		1.23		-0.04		0.96		-0.03		0.82		0.09		0.94		<0.001		<0.001
		Niacin		-0.46		1.11		-0.12		0.66		0.09		0.66		0.49		1.2		<0.001		<0.001		-0.32		1.08		-0.12		0.82		0.07		0.83		0.38		1.1		<0.001		<0.001
		Vitamin B6		-0.61		0.97		-0.21		0.61		0.09		0.6		0.73		1.17		<0.001		<0.001		-0.4		1		-0.17		0.78		0.05		0.82		0.52		1.12		<0.001		<0.001
		Vitamin B12		-0.3		0.98		-0.08		0.6		0.07		0.68		0.3		1.42		<0.001		<0.001		-0.22		0.87		-0.08		0.78		0.06		1.17		0.24		1.07		<0.001		<0.001
		Folate		-0.64		0.93		-0.25		0.52		0.09		0.58		0.8		1.19		<0.001		<0.001		-0.38		0.83		-0.15		0.84		0.03		0.91		0.51		1.16		<0.001		<0.001
		Pantothenic acid		-0.18		1.49		-0.13		0.71		0.02		0.64		0.29		0.87		<0.001		<0.001		-0.14		1.23		-0.07		0.88		-0.01		0.85		0.21		0.96		<0.001		<0.001
		Vitamin C		-0.71		0.66		-0.22		0.52		0.11		0.62		0.82		1.3		<0.001		<0.001		-0.41		0.84		-0.11		0.86		0.06		0.83		0.46		1.22		<0.001		<0.001
		Cholesterol		0.05		1.56		-0.02		0.66		0.03		0.7		-0.05		0.8		<0.001		<0.001		-0.04		1.15		0.01		0.94		0		0.83		0.02		1.05		0.03		0.01
		Dietary fibre		-0.78		0.75		-0.23		0.49		0.11		0.53		0.9		1.2		<0.001		<0.001		-0.47		0.84		-0.17		0.78		0.05		0.79		0.59		1.22		<0.001		<0.001
		Lycopene		-0.26		0.46		-0.11		0.49		0.01		0.69		0.36		1.69		<0.001		<0.001		-0.15		0.69		-0.06		0.77		0		1.13		0.21		1.26		<0.001		<0.001
		α-carotene		-0.36		0.69		-0.1		0.66		0.06		0.82		0.4		1.46		<0.001		<0.001		-0.23		0.83		-0.07		0.83		0.03		0.91		0.28		1.29		<0.001		<0.001
		β-carotene		-0.51		0.64		-0.15		0.59		0.07		0.69		0.59		1.46		<0.001		<0.001		-0.33		0.81		-0.11		0.81		0.03		0.87		0.4		1.28		<0.001		<0.001
		β-Cryptoxanthin		-0.35		0.74		-0.09		0.71		0.06		0.84		0.38		1.4		<0.001		<0.001		-0.16		0.91		0		0.95		0.03		0.91		0.13		1.19		<0.001		<0.001
		PCA, principal component analysis.

## Sheet: Table S6
		Supplementary Table 6 Characteristics of participants stratified by the adoption to the PCA2 patterns
				from pre- to early pregnancy																				from early to mid-pregnancy
				Quartile 1				Quartile 2				Quartile 3				Quartile 4				ANOVA or χ2 test		P for trend		Quartile 1				Quartile 2				Quartile 3				Quartile 4				ANOVA or χ2 test		P for trend
				Mean or n		SD or %		Mean or n		SD or %		Mean or n		SD or %		Mean or n		SD or %						Mean or n		SD or %		Mean or n		SD or %		Mean or n		SD or %		Mean or n		SD or %
		Maternal characteristics
		Maternal age (years), n and %																		<0.001		―																		<0.001		―
		< 25		406		9.2		332		7.5		302		6.8		243		5.5						431		9.7		378		8.5		265		6		209		4.7
		25–29		1240		28		1148		25.9		1075		24.3		1030		23.2						1253		28.3		1162		26.2		1076		24.3		1002		22.6
		30–34		1583		35.7		1654		37.3		1655		37.3		1680		37.9						1584		35.7		1585		35.8		1697		38.3		1706		38.5
		≧ 35		1203		27.1		1298		29.3		1400		31.6		1479		33.4						1164		26.3		1307		29.5		1394		31.5		1515		34.2
		Missing		0		0		0		0		0		0		0		0						0		0		0		0		0		0		0		0
		Pre-pregnancy body mass index (kg/m2) , mean and SD		21.8		3.6		21.6		3.5		21.5		3.4		21.5		3.3		<0.001		<0.001		21.8		3.7		21.6		3.4		21.5		3.3		21.5		3.4		<0.001		<0.001
		Maternal gestational weight gain (kg), mean and SD		10.4		4.4		10.1		4.2		10		4.3		9.9		4		<0.001		<0.001		10.4		4.4		10.2		4.1		10		4.1		9.8		4.3		<0.001		<0.001
		Gestational age (week), mean and SD		39		1.2		39		1.2		39		1.2		39		1.2		0.07		0.42		39		1.2		39		1.2		39		1.2		39		1.2		0.28		0.3
		Parity, n and %																		0.65		―																		<0.001		―
		One or more		2328		52.5		2273		51.3		2279		51.4		2293		51.7						2559		57.7		2306		52		2183		49.3		2125		47.9
		Never		2104		47.5		2159		48.7		2153		48.6		2139		48.3						1873		42.3		2126		48		2249		50.7		2307		52.1
		Missing		0		0		0		0		0		0		0		0						0		0		0		0		0		0		0		0
		Educational qualification, n and %																		<0.001		―																		<0.001		―
		High school graduate or less		1050		23.7		897		20.2		890		20.1		839		18.9						1047		23.6		968		21.8		869		19.6		792		17.9
		College graduate		998		22.5		1122		25.3		1115		25.2		1182		26.7						1012		22.8		1061		23.9		1145		25.8		1199		27.1
		University graduate or above		659		14.9		803		28.1		924		20.8		927		20.9						625		14.1		784		17.7		939		21.2		965		21.8
		Missing		1725		38.9		1610		36.3		1503		33.9		1484		33.5						1748		39.4		1619		36.5		1479		33.4		1476		33.3
		Annual household income (Japanese yen/year), n and %																		<0.001		―																		<0.001		―
		< 4,000,000		1764		39.8		1572		35.5		1405		31.7		1367		30.8						1785		40.3		1547		34.9		1404		31.7		1372		31
		4,000,000–5,999,999		1309		29.5		1383		31.2		1434		32.4		1399		31.6						1294		29.2		1372		31		1441		32.5		1418		32
		≧ 6,000,000		1162		26.2		1301		29.4		1395		31.5		1429		32.2						1168		26.4		1282		28.9		1395		31.5		1442		32.5
		Missing		197		4.4		176		4		198		4.5		237		5.3						185		4.2		231		5.2		192		4.3		200		4.5
		Cigarette smoking, n and %																		<0.001		―																		<0.001		―
		Never		2475		55.8		2631		59.4		2747		62		2845		64.2						2424		54.7		2665		60.1		2794		63		2815		63.5
		Quit before pregnancy		986		22.2		1043		23.5		1037		23.4		1009		22.8						1007		22.7		1011		22.8		1047		23.6		1010		22.8
		Quit just after noticing pregnancy		811		18.3		631		14.2		552		12.5		493		11.1						811		18.3		643		14.5		515		11.6		518		11.7
		Current		146		3.3		114		2.6		79		1.8		71		1.6						172		3.9		96		2.2		66		1.5		76		1.7
		Missing		14		0.3		13		0.3		17		0.4		14		0.3						18		0.4		17		0.4		10		0.2		13		0.3
		Alcohol consumption, n and %																		0.08		―																		0.37		―
		Never		1915		43.2		2034		45.9		2009		45.3		2058		46.4						2005		45.2		1982		44.7		2017		45.5		2012		45.4
		Former		1553		35		1496		33.8		1552		35		1517		34.2						1534		34.6		1500		33.8		1572		35.5		1512		34.1
		Current		951		21.5		891		20.1		861		19.4		844		19						881		19.9		935		21.1		833		18.8		898		20.3
		Missing		13		0.3		11		0.2		10		0.2		13		0.3						12		0.3		15		0.3		10		0.2		10		0.2
		Folic acid supplement consumption during early pregnancy, n and %																		<0.001		―																		<0.001		―
		Yes		2288		51.6		2438		55		2559		57.7		2705		61						2169		48.9		2410		54.4		2648		59.7		2763		62.3
		No		2139		48.3		1985		44.8		1864		42.1		1720		38.8						2254		50.9		2016		45.5		1776		40.1		1662		37.5
		Missing		5		0.1		9		0.2		9		0.2		7		0.2						9		0.2		6		0.1		8		0.2		7		0.2
		Child characteristics
		Sex, n and %																		0.04		―																		1		―
		Boys		2286		51.6		2274		51.3		2234		50.4		2365		53.4						2283		51.5		2297		51.8		2292		51.7		2287		51.6
		Girls		2146		48.4		2158		48.7		2198		49.6		2067		46.6						2149		48.5		2135		48.2		2140		48.3		2145		48.4
		Missing		0		0		0		0		0		0		0		0						0		0		0		0		0		0		0		0
		Birth weight SD score, mean and SD		0.16		0.98		0.13		0.96		0.16		0.93		0.14		0.95		0.4		0.7		0.13		0.95		0.14		0.95		0.15		0.96		0.16		0.96		0.32		0.06
		Small for gestational age, n and %																		0.03		―																		0.45		―
		Yes		291		6.6		303		6.8		239		5.4		283		6.4						296		6.7		279		6.3		282		6.4		259		5.8
		No		4141		93.4		4129		93.2		4193		94.6		4149		93.6						4136		93.3		4153		93.7		4150		93.6		4173		94.2
		Missing		0		0		0		0		0		0		0		0						0		0		0		0		0		0		0		0
		Birth weight (g), mean and SD		3075		376		3064		366		3079		361		3069		369		0.2		0.96		3069		369		3072		363		3071		368		3074		372		0.94		0.57
		Dietary information
		Energy intake (kcal/day), mean and SD		1945		619		1572		459		1504		469		1724		674		<0.001		<0.001		1818		626		1610		518		1597		534		1721		636		<0.001		<0.001
		z-score of energy adjusted food intake, mean and SD
		Cereals		0.52		1.17		0.19		0.78		-0.1		0.74		-0.61		0.89		<0.001		<0.001		0.35		1.13		0.13		0.85		-0.09		0.85		-0.39		0.99		<0.001		<0.001
		Pulses		-0.34		0.69		-0.12		0.62		0.05		0.75		0.41		1.51		<0.001		<0.001		-0.26		0.73		-0.13		0.68		0.03		0.93		0.36		1.38		<0.001		<0.001
		Nuts and seeds		0.08		1.71		0		0.61		-0.02		0.53		-0.06		0.64		<0.001		<0.001		-0.01		0.69		0		1.51		-0.01		0.64		0.02		0.9		0.24		0.16
		Vegetables		-0.37		0.7		-0.1		0.61		0.09		0.71		0.38		1.53		<0.001		<0.001		-0.26		0.77		-0.1		0.75		0.05		0.96		0.3		1.32		<0.001		<0.001
		Fruits		-0.27		0.86		-0.05		0.79		0.1		0.85		0.22		1.33		<0.001		<0.001		-0.18		0.94		-0.04		0.87		0.05		0.92		0.17		1.21		<0.001		<0.001
		Mushroom		-0.2		0.92		-0.02		0.87		0.08		0.91		0.15		1.23		<0.001		<0.001		-0.18		0.89		-0.07		0.84		0.04		0.95		0.21		1.23		<0.001		<0.001
		Fish and shellfish		0.04		1.36		0.04		0.84		0.03		0.79		-0.1		0.89		<0.001		<0.001		0.05		1.29		0		0.81		0		0.89		-0.05		0.94		<0.001		<0.001
		Meat		0.46		1.41		0.02		0.7		-0.07		0.68		-0.41		0.82		<0.001		<0.001		0.27		1.27		0.04		0.83		-0.09		0.82		-0.23		0.96		<0.001		<0.001
		Eggs		-0.38		0.49		-0.13		0.44		0.06		0.52		0.45		1.71		<0.001		<0.001		-0.15		1.01		-0.05		0.74		0.05		0.98		0.15		1.2		<0.001		<0.001
		Milk and dairy products		-0.63		0.49		-0.22		0.36		0.03		0.41		0.82		1.54		<0.001		<0.001		-0.36		0.8		-0.1		0.7		0.09		0.9		0.38		1.33		<0.001		<0.001
		Confectioneries		0.24		1.48		0.02		0.79		-0.04		0.72		-0.23		0.75		<0.001		<0.001		0.04		1.15		-0.01		0.86		0		0.88		-0.03		1.07		0.005		0.001
		Alcohol beverage		-0.01		1.25		0.05		0.93		0.02		0.83		-0.06		0.94		<0.001		0.005		0.04		1.22		0.01		0.93		0		0.86		-0.05		0.96		<0.001		<0.001
		Non-Alcohol beverage		0.19		1.33		0.03		0.87		-0.06		0.78		-0.16		0.89		<0.001		<0.001		0.07		1.12		-0.01		0.89		-0.03		0.97		-0.04		1		<0.001		<0.001
		z-score of energy adjusted nutrients intake, mean and SD
		Protein		-0.32		1.19		-0.15		0.81		0.04		0.73		0.44		1.03		<0.001		<0.001		-0.18		1.17		-0.09		0.82		0.03		0.9		0.24		1.02		<0.001		<0.001
		Fat		-0.12		1.34		-0.15		0.83		0.02		0.77		0.25		0.91		<0.001		<0.001		-0.12		1.2		-0.07		0.91		0.02		0.87		0.17		0.96		<0.001		<0.001
		Carbohydrate		0.15		1.25		0.1		0.86		-0.03		0.8		-0.22		0.98		<0.001		<0.001		0.09		1.17		0.06		0.88		-0.03		0.89		-0.12		1.02		<0.001		<0.001
		Sodium		-0.17		1.07		-0.04		0.86		0.07		0.82		0.13		1.18		<0.001		<0.001		-0.08		1.06		-0.05		0.89		0.01		0.93		0.12		1.1		<0.001		<0.001
		Potassium		-0.73		0.83		-0.23		0.62		0.12		0.61		0.84		1.11		<0.001		<0.001		-0.48		0.9		-0.18		0.78		0.1		0.84		0.55		1.14		<0.001		<0.001
		Calcium		-0.75		0.57		-0.25		0.36		0.07		0.36		0.93		1.39		<0.001		<0.001		-0.45		0.85		-0.14		0.69		0.11		0.86		0.49		1.26		<0.001		<0.001
		Magnesium		-0.6		0.91		-0.16		0.73		0.12		0.71		0.64		1.16		<0.001		<0.001		-0.4		0.92		-0.15		0.82		0.08		0.86		0.46		1.16		<0.001		<0.001
		Phosphorus		-0.69		0.8		-0.24		0.56		0.08		0.51		0.85		1.24		<0.001		<0.001		-0.4		0.94		-0.14		0.75		0.09		0.87		0.45		1.19		<0.001		<0.001
		Iron		-0.28		0.95		-0.08		0.77		0.08		0.77		0.28		1.31		<0.001		<0.001		-0.2		0.99		-0.1		0.81		0.03		0.92		0.27		1.18		<0.001		<0.001
		Zinc		-0.25		1.2		-0.16		0.8		0.01		0.71		0.4		1.08		<0.001		<0.001		-0.14		1.16		-0.07		0.84		0		0.88		0.21		1.05		<0.001		<0.001
		Copper		-0.19		1		-0.03		0.8		0.07		0.8		0.16		1.29		<0.001		<0.001		-0.17		0.96		-0.06		0.84		0.02		0.93		0.22		1.19		<0.001		<0.001
		Manganese		0.2		1.26		0.07		0.87		-0.04		0.8		-0.23		0.96		<0.001		<0.001		0.08		1.11		0		0.88		-0.03		0.94		-0.06		1.05		<0.001		<0.001
		Retinol equivalents		-0.21		1.5		-0.07		0.5		0.04		0.46		0.24		1.09		<0.001		<0.001		-0.11		1.46		-0.06		0.53		0.02		0.55		0.15		1.11		<0.001		<0.001
		Vitamin D		-0.08		1.4		0		0.83		0.04		0.83		0.04		0.8		<0.001		<0.001		-0.02		1.36		-0.02		0.74		0.02		0.94		0.02		0.85		0.07		0.02
		Vitamin K		-0.34		0.79		-0.08		0.75		0.09		0.78		0.32		1.41		<0.001		<0.001		-0.23		0.85		-0.07		0.82		0.04		0.94		0.26		1.26		<0.001		<0.001
		Vitamin B1		-0.18		1.36		-0.13		0.8		0.04		0.74		0.27		0.91		<0.001		<0.001		-0.15		1.25		-0.08		0.86		0.02		0.81		0.21		0.99		<0.001		<0.001
		Vitamin B2		-0.67		0.86		-0.24		0.49		0.06		0.46		0.85		1.25		<0.001		<0.001		-0.39		1.02		-0.14		0.71		0.09		0.84		0.44		1.17		<0.001		<0.001
		Niacin		0.24		1.28		0.05		0.81		0		0.73		-0.29		1.02		<0.001		<0.001		0.14		1.2		0		0.87		-0.05		0.87		-0.1		1.01		<0.001		<0.001
		Vitamin B6		-0.28		1.16		-0.08		0.81		0.08		0.76		0.29		1.11		<0.001		<0.001		-0.17		1.09		-0.09		0.86		0.03		0.9		0.24		1.08		<0.001		<0.001
		Vitamin B12		-0.1		1.4		-0.03		0.74		0.03		0.69		0.09		1		<0.001		<0.001		-0.01		1.33		-0.02		0.74		0		0.77		0.04		1.04		0.03		0.01
		Folate		-0.47		0.96		-0.12		0.69		0.1		0.69		0.49		1.29		<0.001		<0.001		-0.33		0.96		-0.12		0.76		0.07		0.85		0.38		1.23		<0.001		<0.001
		Pantothenic acid		-0.65		0.88		-0.24		0.59		0.08		0.55		0.81		1.2		<0.001		<0.001		-0.38		0.98		-0.13		0.74		0.08		0.87		0.44		1.17		<0.001		<0.001
		Vitamin C		-0.38		0.86		-0.08		0.78		0.11		0.79		0.36		1.32		<0.001		<0.001		-0.29		0.88		-0.08		0.82		0.07		0.9		0.3		1.25		<0.001		<0.001
		Cholesterol		-0.34		0.69		-0.15		0.54		0.05		0.58		0.44		1.61		<0.001		<0.001		-0.13		1.04		-0.06		0.76		0.04		0.95		0.15		1.18		<0.001		<0.001
		Dietary fibre		-0.39		0.86		-0.07		0.73		0.12		0.78		0.33		1.36		<0.001		<0.001		-0.32		0.87		-0.1		0.8		0.07		0.9		0.35		1.25		<0.001		<0.001
		Lycopene		-0.16		0.68		-0.07		0.6		0.01		0.71		0.22		1.61		<0.001		<0.001		-0.1		0.84		-0.06		0.76		0.01		1.16		0.15		1.16		<0.001		<0.001
		α-carotene		-0.25		0.81		-0.06		0.7		0.06		0.8		0.26		1.44		<0.001		<0.001		-0.17		0.85		-0.06		0.83		0.04		0.96		0.19		1.26		<0.001		<0.001
		β-carotene		-0.33		0.8		-0.08		0.67		0.08		0.75		0.34		1.45		<0.001		<0.001		-0.23		0.82		-0.08		0.8		0.06		0.97		0.26		1.27		<0.001		<0.001
		β-Cryptoxanthin		-0.22		0.84		-0.03		0.9		0.08		0.89		0.17		1.27		<0.001		<0.001		-0.13		0.96		-0.02		0.9		0.04		0.9		0.12		1.19		<0.001		<0.001
		PCA, principal component analysis.

## Sheet: Table S7
		Supplementary Table 7 Factor loadingsa and explained variation of dietary patterns identified using RRR, PLS and PCA with the excluded subjects who had available data on dietary intake and incidence of SGA (n = 18,667)
				from pre- to early pregnancy								from early to mid pregnancy
				RRR		PLS		PCA				RRR		PLS		PCA
								PCA1		PCA2						PCA1		PCA2
		Factor loadings of food groups
		Cereals		0.43		0.45		–0.15		–0.36		0.32		0.28		–0.10		–0.43
		Pulses		–0.01		–0.0005		0.34		0.19		0.05		0.11		0.3		0.3
		Nuts and seeds		0.17		0.15		0.14		–0.12		–0.06		–0.05		0.15		0.01
		Vegetables		0.05		0.11		0.49		0.21		0.16		0.25		0.46		0.28
		Fruits		0.56		0.49		0.32		0.08		0.48		0.43		0.21		0.13
		Mushroom		0.03		0.1		0.5		0.05		0.19		0.24		0.47		0.15
		Fish and shellfish		0.03		0.07		0.34		–0.08		–0.06		–0.01		0.4		–0.10
		Meat		0.12		0.05		–0.01		–0.33		–0.04		–0.13		0.21		–0.38
		Eggs		0.06		0.009		–0.09		0.41		–0.11		–0.10		–0.14		0.32
		Milk and dairy products		–0.12		–0.16		–0.23		0.64		0.15		0.14		–0.33		0.57
		Confectioneries		–0.09		–0.06		0.09		–0.25		–0.12		–0.16		0.06		–0.10
		Alcohol beverage		–0.41		–0.54		–0.18		0.007		–0.31		–0.41		–0.21		–0.04
		Non-Alcohol beverage		–0.51		–0.44		0.14		–0.13		–0.67		–0.60		0.13		–0.10
		Explained variation (%) in food groups		7.5		8.7		12.7		10.9		7.2		8.2		13.5		11.6
		Explained variation (%) in birth weight SD score		0.24		0.21		0.006		0.003		0.43		0.4		0.005		0.009
		RRR, reduced-rank regression; PLS, partial least-squares regression; PCA, principal component analysis; SD, standard deviation.
		a Factor loadings ≧ |0.20| are shown in bold.

## Sheet: Table S8
		Supplementary Table 8 Associations of dietary patterns with birth weight SD score and SGA with the excluded subjects who had available data on dietary intake and incidence of SGA (n = 18,667)
				Quartile 1		Quartile 2					Quartile 3					Quartile 4					P for trend
						β or OR	95% CI				β or OR	95% CI				β or OR	95% CI
		From pre- to early pregnancy
		Birth weight SD score, β and 95%CI
		RRR
		Unadjusted model		Reference		0.06	0.02	,	0.1		0.11	0.07	,	0.15		0.13	0.09	,	0.17		< 0.001
		Adjusted model 1a		Reference		0.06	0.02	,	0.1		0.1	0.06	,	0.15		0.12	0.07	,	0.16		< 0.001
		Adjusted model 2b		Reference		0.05	0.01	,	0.09		0.09	0.05	,	0.13		0.09	0.05	,	0.14		< 0.001
		PLS
		Unadjusted model		Reference		0.07	0.03	,	0.12		0.11	0.07	,	0.15		0.14	0.09	,	0.18		< 0.001
		Adjusted model 1		Reference		0.07	0.03	,	0.11		0.1	0.06	,	0.14		0.13	0.08	,	0.17		< 0.001
		Adjusted model 2		Reference		0.06	0.02	,	0.1		0.09	0.05	,	0.13		0.11	0.07	,	0.15		< 0.001
		PCA1
		Unadjusted model		Reference		0.04	–0.001	,	0.08		0.02	–0.02	,	0.06		0.03	–0.01	,	0.07		0.28
		Adjusted model 1		Reference		0.04	–0.004	,	0.08		0.01	–0.03	,	0.05		0.01	–0.03	,	0.05		0.94
		Adjusted model 2		Reference		0.05	0.01	,	0.08		0.02	–0.02	,	0.06		0.02	–0.02	,	0.06		0.54
		PCA2
		Unadjusted model		Reference		–0.03	–0.07	,	0.02		0.001	–0.04	,	0.04		–0.01	–0.05	,	0.03		0.93
		Adjusted model 1		Reference		–0.02	–0.06	,	0.02		0.001	–0.04	,	0.04		–0.01	–0.05	,	0.03		0.87
		Adjusted model 2		Reference		–0.02	–0.06	,	0.02		0.01	–0.03	,	0.05		0.001	–0.04	,	0.04		0.6
		SGA, OR and 95%CI
		RRR
		Unadjusted model		Reference		0.89	0.76	,	1.04		0.72	0.61	,	0.85		0.8	0.68	,	0.94		< 0.001
		Adjusted model 1		Reference		0.89	0.76	,	1.05		0.73	0.62	,	0.86		0.82	0.7	,	0.97		0.003
		Adjusted model 2		Reference		0.92	0.78	,	1.08		0.74	0.63	,	0.88		0.86	0.72	,	1.01		0.01
		PLS
		Unadjusted model		Reference		0.83	0.71	,	0.98		0.77	0.66	,	0.9		0.74	0.62	,	0.87		< 0.001
		Adjusted model 1		Reference		0.84	0.72	,	0.99		0.78	0.66	,	0.92		0.74	0.63	,	0.88		< 0.001
		Adjusted model 2		Reference		0.84	0.72	,	0.99		0.79	0.67	,	0.94		0.77	0.65	,	0.91		0.003
		PCA1
		Unadjusted model		Reference		0.88	0.74	,	1.03		0.92	0.78	,	1.09		0.97	0.83	,	1.14		0.9
		Adjusted model 1		Reference		0.89	0.75	,	1.05		0.94	0.8	,	1.11		1	0.85	,	1.18		0.8
		Adjusted model 2		Reference		0.87	0.74	,	1.03		0.92	0.78	,	1.09		0.97	0.83	,	1.15		0.93
		PCA2
		Unadjusted model		Reference		1.04	0.89	,	1.22		0.85	0.72	,	1.004		0.92	0.78	,	1.08		0.09
		Adjusted model 1		Reference		1.05	0.89	,	1.23		0.86	0.73	,	1.02		0.93	0.79	,	1.1		0.14
		Adjusted model 2		Reference		1.04	0.89	,	1.22		0.84	0.71	,	0.99		0.92	0.77	,	1.08		0.08
		From early to mid pregnancy
		Birth weight SD score, β and 95%CI
		RRR
		Unadjusted model		Reference		0.09	0.05	,	0.13		0.11	0.07	,	0.15		0.16	0.12	,	0.2		< 0.001
		Adjusted model 1		Reference		0.08	0.04	,	0.13		0.1	0.06	,	0.15		0.15	0.11	,	0.19		< 0.001
		Adjusted model 2		Reference		0.07	0.03	,	0.11		0.09	0.05	,	0.13		0.12	0.08	,	0.17		< 0.001
		PLS
		Unadjusted model		Reference		0.07	0.03	,	0.11		0.11	0.07	,	0.15		0.16	0.12	,	0.2		< 0.001
		Adjusted model 1		Reference		0.07	0.03	,	0.11		0.11	0.06	,	0.15		0.15	0.11	,	0.19		< 0.001
		Adjusted model 2		Reference		0.05	0.01	,	0.09		0.1	0.06	,	0.14		0.13	0.09	,	0.17		< 0.001
		PCA1
		Unadjusted model		Reference		–0.02	–0.06	,	0.02		0.02	–0.02	,	0.06		0.01	–0.03	,	0.05		0.27
		Adjusted model 1		Reference		–0.03	–0.07	,	0.02		0.004	–0.04	,	0.04		–0.01	–0.05	,	0.03		0.93
		Adjusted model 2		Reference		–0.02	–0.06	,	0.02		0.01	–0.03	,	0.05		–0.004	–0.04	,	0.04		0.71
		PCA2
		Unadjusted model		Reference		–0.01	–0.05	,	0.03		0.03	–0.01	,	0.07		0.03	–0.01	,	0.07		0.046
		Adjusted model 1		Reference		–0.01	–0.05	,	0.04		0.03	–0.01	,	0.07		0.03	–0.01	,	0.07		0.07
		Adjusted model 2		Reference		–0.003	–0.04	,	0.04		0.04	0.0004	,	0.08		0.05	0.01	,	0.09		0.005
		SGA, OR and 95%CI
		RRR
		Unadjusted model		Reference		0.84	0.72	,	0.99		0.8	0.69	,	0.95		0.75	0.64	,	0.89		< 0.001
		Adjusted model 1		Reference		0.85	0.72	,	0.998		0.82	0.69	,	0.96		0.77	0.65	,	0.91		0.002
		Adjusted model 2		Reference		0.88	0.75	,	1.03		0.83	0.71	,	0.98		0.8	0.68	,	0.95		0.009
		PLS
		Unadjusted model		Reference		0.87	0.74	,	1.02		0.77	0.65	,	0.9		0.72	0.61	,	0.85		< 0.001
		Adjusted model 1		Reference		0.88	0.75	,	1.03		0.78	0.66	,	0.92		0.73	0.61	,	0.86		< 0.001
		Adjusted model 2		Reference		0.9	0.77	,	1.06		0.79	0.67	,	0.94		0.76	0.64	,	0.9		< 0.001
		PCA1
		Unadjusted model		Reference		1	0.85	,	1.18		1.1	0.94	,	1.29		0.94	0.8	,	1.12		0.79
		Adjusted model 1		Reference		1.01	0.86	,	1.19		1.12	0.96	,	1.32		0.97	0.82	,	1.15		0.89
		Adjusted model 2		Reference		1.01	0.85	,	1.19		1.11	0.94	,	1.3		0.96	0.81	,	1.14		0.91
		PCA2
		Unadjusted model		Reference		0.93	0.79	,	1.09		0.91	0.77	,	1.07		0.85	0.73	,	1.01		0.06
		Adjusted model 1		Reference		0.93	0.79	,	1.1		0.92	0.78	,	1.09		0.87	0.74	,	1.03		0.12
		Adjusted model 2		Reference		0.93	0.79	,	1.09		0.9	0.76	,	1.06		0.84	0.71	,	0.997		0.046
		RRR, reduced-rank regression; PLS, partial least-squares regression; PCA, principal component analysis; β, regression coefficients; OR, odds ratio; CI, confidence interval; SGA, small for gestational age. a Model 1 adjusted for maternal age (< 25; 25–29; 30–34; ≧ 35, years), pre-pregnancy body mass index (continuous kg/m2), educational attainment (high school graduate or less; junior college or v…

## Sheet: Table S9
		Supplementary Table 9 The characteristics of the 17,728 mothers who were analyzed and the 4,765 mothers who were excluded from the analysis
		Variables		Mothers who were analyzed (n = 17,728)				Mothers who were not analyzed (n = 4,765)
				Mean or n		SD or %a		Mean or n		SD or %
		Maternal characteristics
		Maternal age (years), n and %
		< 25		1283		7.2		481		11.6
		25–29		4493		25.3		1126		27.2
		30–34		6572		37.1		1391		33.6
		≧ 35		5380		30.3		1137		27.5
		Number of missing values		0		—		630		—
		Pre-pregnancy body mass index (kg/m2) , mean and SD		21.6		3.4		21.7		3.7
		Number of missing values		228		—		388		—
		Maternal gestational weight gain (kg), mean and SD		10.1		4.2		9.6		4.9
		Number of missing values		4152		—		1787		—
		Gestational age (week), mean and SD		39		1.2		36.6		4.7
		Number of missing values		0		—		638		—
		Parity, n and %
		One or more		9173		51.7		2192		49.5
		Never		8555		48.3		2240		50.5
		Number of missing values		0		—		333		—
		Educational qualification, n and %
		High school graduate or less		3676		32.2		646		37
		College graduate		4417		38.7		688		39.4
		University graduate or above		3313		29		414		23.7
		Number of missing values		6322		—		3017		—
		Annual household income (Japanese yen/year), n and %
		< 4,000,000		6108		36.1		1133		39.9
		4,000,000–5,999,999		5525		32.7		908		31.9
		≧ 6,000,000		5287		31.2		801		28.2
		Number of missing values		808		—		1923		—
		Cigarette smoking, n and %
		Never		10698		60.5		2003		55.8
		Quit before pregnancy		4075		23.1		877		24.4
		Quit after noticing pregnancy		2487		14.1		582		16.2
		Current		410		2.3		129		3.6
		Number of missing values		58		—		1174		—
		Alcohol consumption, n and %
		Never		8016		45.3		1695		47.1
		Former		6118		34.6		1246		34.6
		Current		3547		20.1		659		18.3
		Number of missing values		47		—		1165		—
		Folic acid supplement consumption during early pregnancy, n and %
		Yes		9990		56.4		1934		53.6
		No		7708		43.6		1671		46.4
		Number of missing values		30		—		1160		—
		Child characteristics
		Sex, n and %
		Boys		9159		51.7		2772		58.2
		Girls		8569		48.3		1993		41.8
		Number of missing values		0		—		0		—
		Birth weight (g), mean and SD		3072		368		2701		714
		Number of missing values		0		—		692		—
		Birth weight SD score, mean and SD		0.15		0.96		0		1.08
		Number of missing values		0		—		877		—
		Small for gestational age, n and %
		Yes		1116		6.3		429		11
		No		16612		93.7		3483		89
		Number of missing values		0		—		853		—
		Hypertensive disorders of pregnancy, n and %
		Yes		692		3.9		342		7.2
		No		17036		96.1		4423		92.8
		Number of missing values		0		—		0		—
		Gestational diabetes mellitus, n and %
		Yes		403		2.3		133		2.8
		No		17325		97.7		4632		97.2
		Number of missing values		0		—		853		—
		SD, standard deviation.
		a Frequency percentages do not include the number of missing values.

## Sheet: Table S10
		Supplementary Table 10 Factor loadingsa and explained variation of dietary patterns identified using RRR, PLS and PCA in subjects without gestational diabetes mellitus (n = 17,325)
				from pre- to early pregnancy								from early to mid pregnancy
				RRR		PLS		PCA				RRR		PLS		PCA
								PCA1		PCA2						PCA1		PCA2
		Factor loadings of food groups
		Cereals		0.35		0.4		–0.14		–0.31		0.32		0.3		–0.10		–0.43
		Pulses		–0.02		–0.02		0.33		0.2		0.06		0.08		0.3		0.29
		Nuts and seeds		0.1		0.08		0.15		–0.06		–0.09		–0.09		0.16		0.02
		Vegetables		–0.09		–0.01		0.48		0.23		0.04		0.12		0.47		0.26
		Fruits		0.6		0.53		0.32		0.14		0.48		0.41		0.21		0.14
		Mushroom		0.003		0.03		0.49		0.05		0.14		0.14		0.48		0.14
		Fish and shellfish		0.02		0.04		0.34		–0.12		–0.08		–0.08		0.4		–0.13
		Meat		0.08		0.03		0.004		–0.42		–0.11		–0.22		0.19		–0.39
		Eggs		0.11		0.08		–0.11		0.39		–0.07		–0.04		–0.13		0.31
		Milk and dairy products		–0.06		–0.04		–0.27		0.64		0.22		0.26		–0.31		0.58
		Confectioneries		–0.13		–0.12		0.12		–0.16		–0.15		–0.19		0.05		–0.08
		Alcohol beverage		–0.41		–0.53		–0.18		–0.06		–0.31		–0.38		–0.21		–0.04
		Non-Alcohol beverage		–0.54		–0.50		0.16		–0.10		–0.67		–0.62		0.12		–0.09
		Explained variation (%) in food groups		7.5		8.2		12.8		10.9		7.2		8.1		13.5		11.6
		Explained variation (%) in birth weight SD score		0.34		0.32		0.002		0.0001		0.52		0.48		0.0001		0.02
		RRR, reduced-rank regression; PLS, partial least-squares regression; PCA, principal component analysis; SD, standard deviation.
		a Factor loadings ≧ |0.20| are shown in bold.

[truncated: 1 more sheets: Table S11]
